# Supplementary material for: Protection against myocardial ischemia/reperfusion injury in mice by 3-caffeoylquinic acid isomers isolated from Saxifraga tangutica
Source: Royal Society of Chemistry journal article supplement (doi:10.1039/d4ra00046c), 2024-01-01
Supplement: d4ra00046c2.pdf [file d4ra00046c2.pdf]

**Protection against myocardial ischemia/reperfusion injury in mice using antioxidative 3-caffeoylquinic acid isomers prepared and isolated from *Saxifraga tangutica*: DPPH assay, Langendorff's *in vitro* model and mitochondrial biogenesis**

Yingying Tong<sup>ab</sup>, Gang Li<sup>\*b</sup>, Xiaobing Shi<sup>b</sup>, Lin Wang<sup>b</sup>, Jia Zhou<sup>ab</sup>, Ming Chu<sup>b</sup>, Zhenhua Wang<sup>b</sup>, A. M. Abd. El-Aty<sup>cd</sup> and Jun Dang<sup>\*a</sup>

<sup>a</sup> Qinghai Provincial Key Laboratory of Tibetan Medicine Research, Key Laboratory of Tibetan Medicine Research, Northwest Institute of Plateau Biology, Chinese Academy of Sciences, Xining 810001, Qinghai, China

<sup>b</sup> Center for Mitochondria and Healthy Aging, College of Life Sciences, Yantai University, Yantai 264005, China

<sup>c</sup> Department of Pharmacology, Faculty of Veterinary Medicine, Cairo University, Giza 12211, Egypt

<sup>d</sup> Department of Medical Pharmacology, Faculty of Medicine, Atatürk University, Erzurum 25240, Turkey

**\* Correspondence: Jun Dang**, Qinghai Provincial Key Laboratory of Tibetan Medicine Research, Key Laboratory of Tibetan Medicine Research, Northwest Institute of Plateau Biology, Chinese Academy of Sciences, Xining 810001, P. R. China.

**E-mail:** dangjun@nwipb.cas.cn (**Jun Dang**).

**Fax/Phone number:** +86-971-6143282

## Table of Contents

Figure S1.  $^1\text{H}$  NMR (600 MHz) (A),  $^{13}\text{C}$  NMR (151 MHz) (B), and HR-ESI-MS (C) spectra of compound Fr2-4-1-1 (neochlorogenic acid) in  $\text{MeOH-}d_4$ .

Figure S2.  $^1\text{H}$  NMR (600 MHz) (D),  $^{13}\text{C}$  NMR (151 MHz) (E), and HR-ESI-MS (F) spectra of compound Fr2-5-1-1 (chlorogenic acid) in  $\text{MeOH-}d_4$ .

Figure S3.  $^1\text{H}$  NMR (600 MHz) (G),  $^{13}\text{C}$  NMR (151 MHz) (H), and HR-ESI-MS (I) spectra of compound Fr2-5-2-1 (cryptochlorogenic acid) in  $\text{MeOH-}d_4$ .

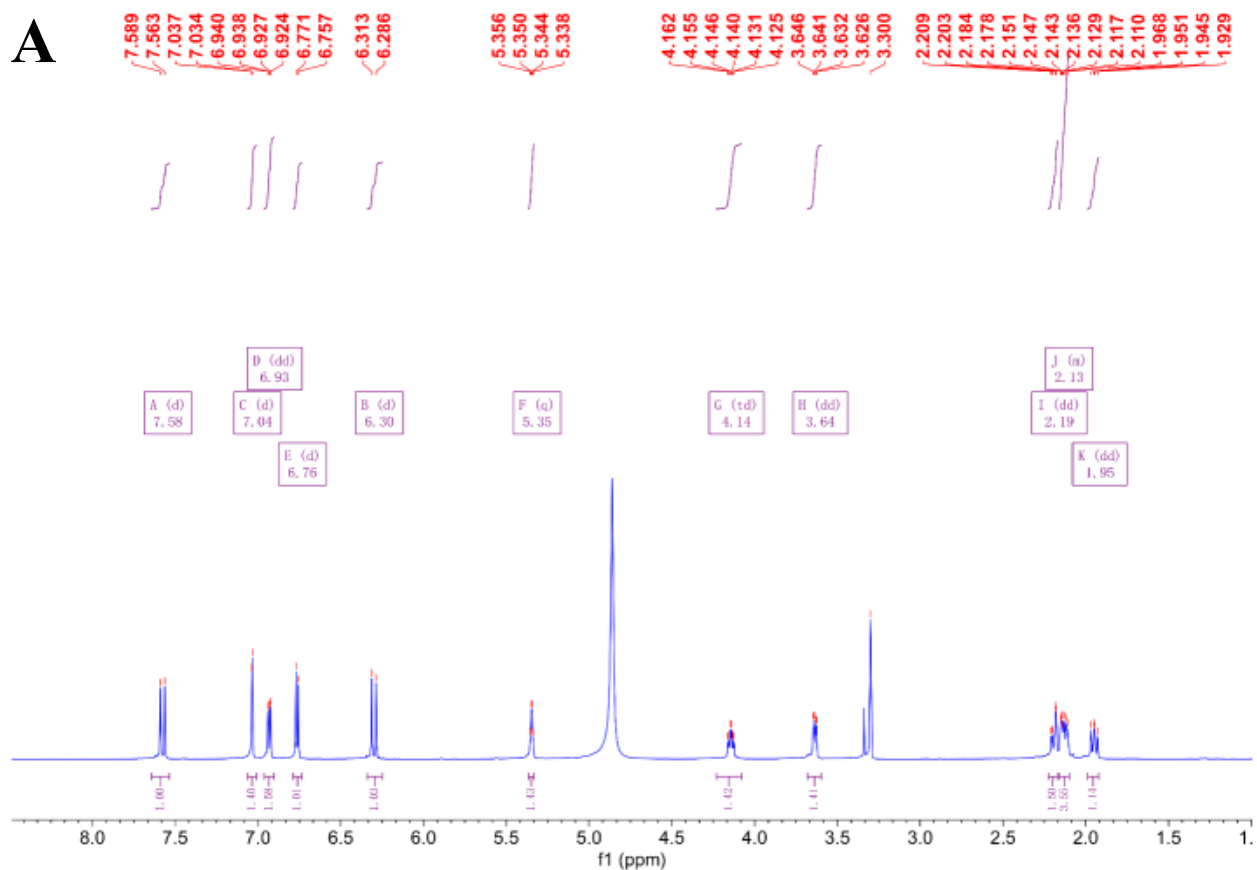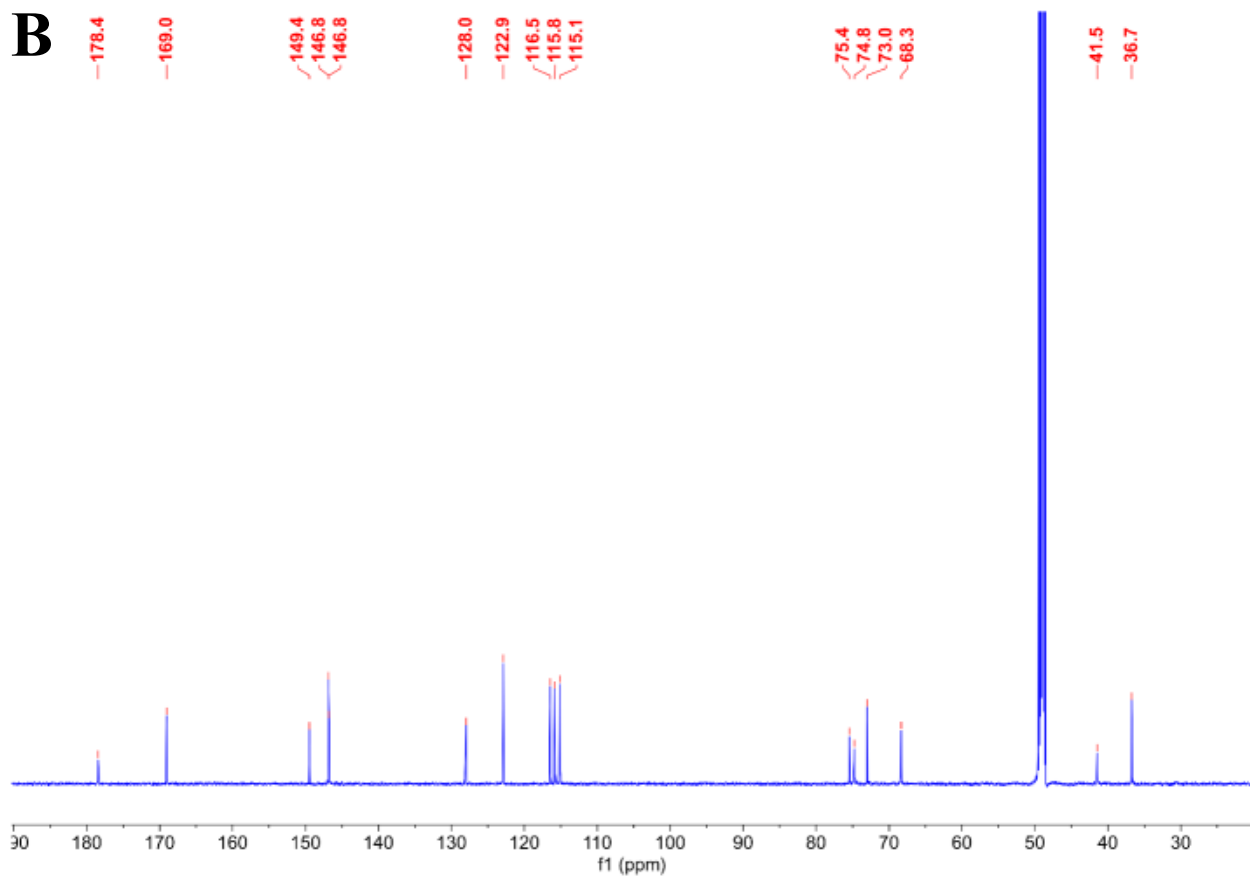

Supplementary Fig. S1.  $^1\text{H}$  NMR (600 MHz) (A),  $^{13}\text{C}$  NMR (151 MHz) (B), and HR-ESI-MS (C) spectra of compound Fr2-4-1-1 (neochlorogenic acid) in  $\text{MeOH-}d_4$ .

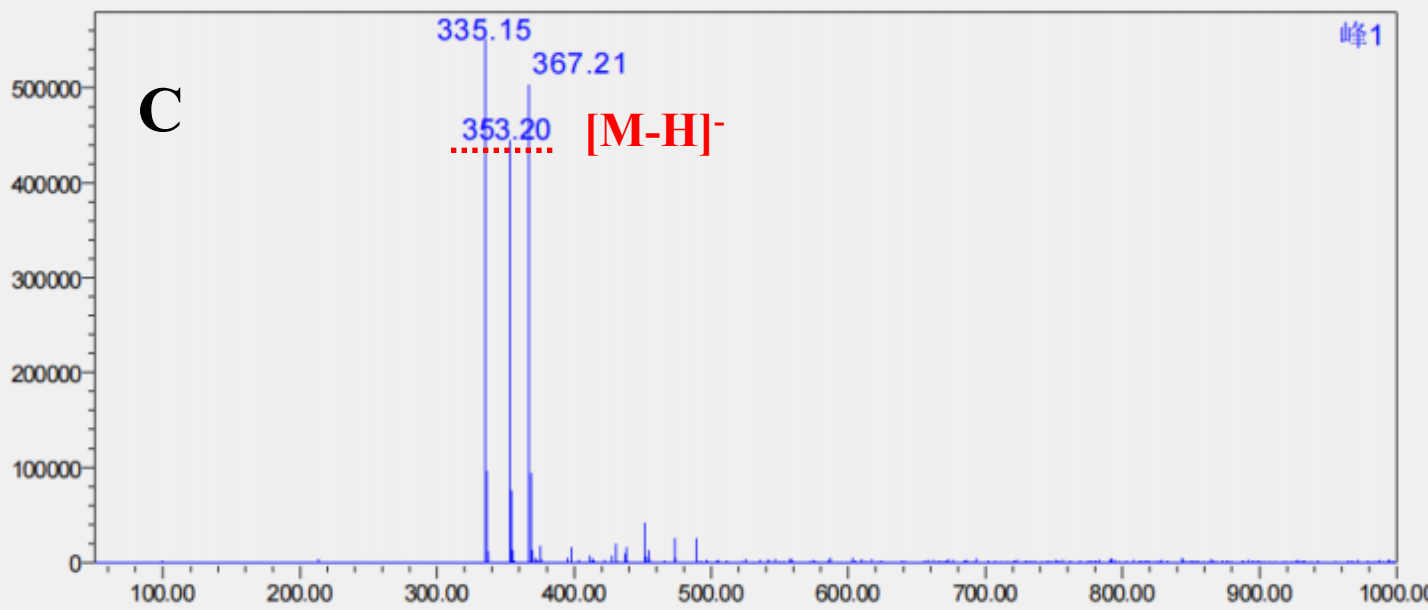

Supplementary Fig. S1. (continued)

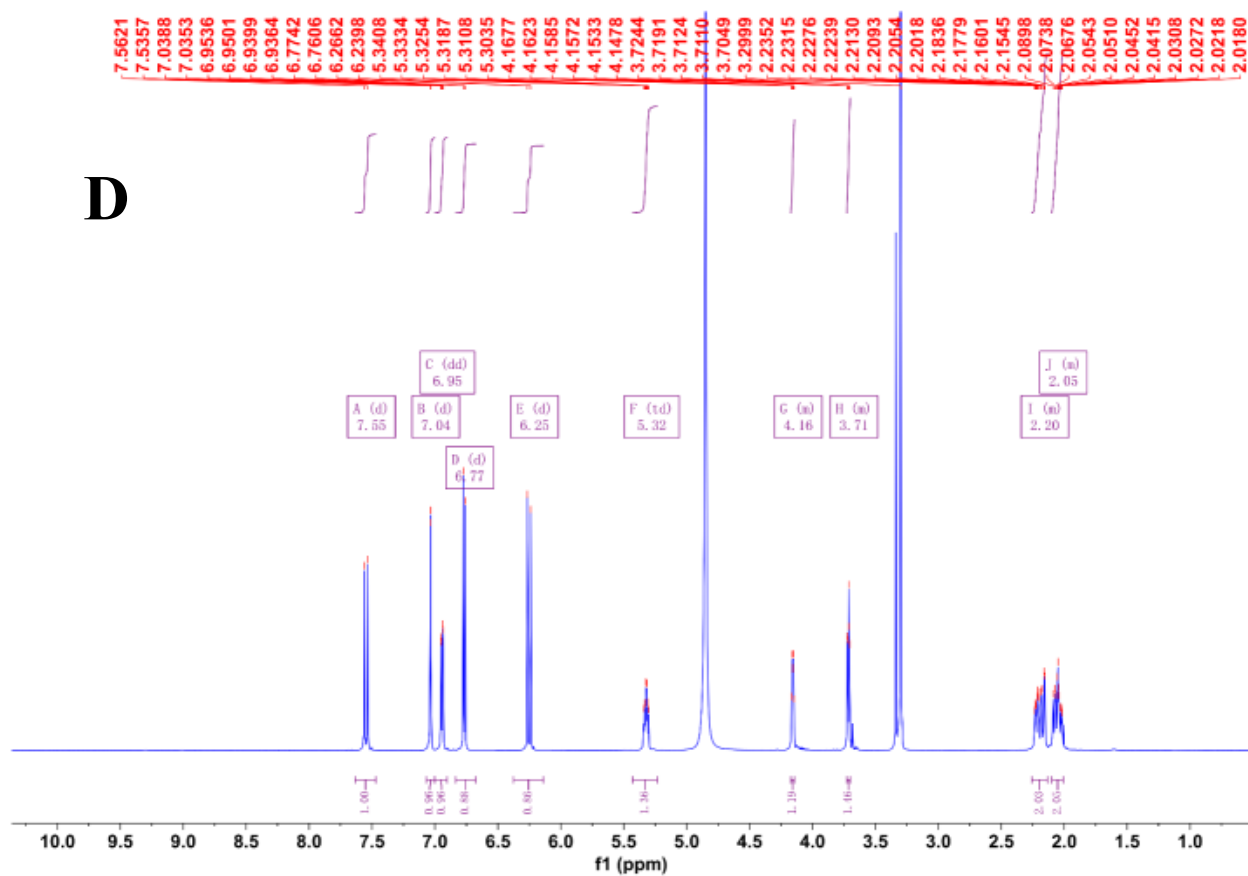

Supplementary Fig. S2. <sup>1</sup>H NMR (600 MHz) (D), <sup>13</sup>C NMR (151 MHz) (E), and HR-ESI-MS (F) spectra of compound Fr2-5-1-1 (chlorogenic acid) in MeOH-*d*<sub>4</sub>.

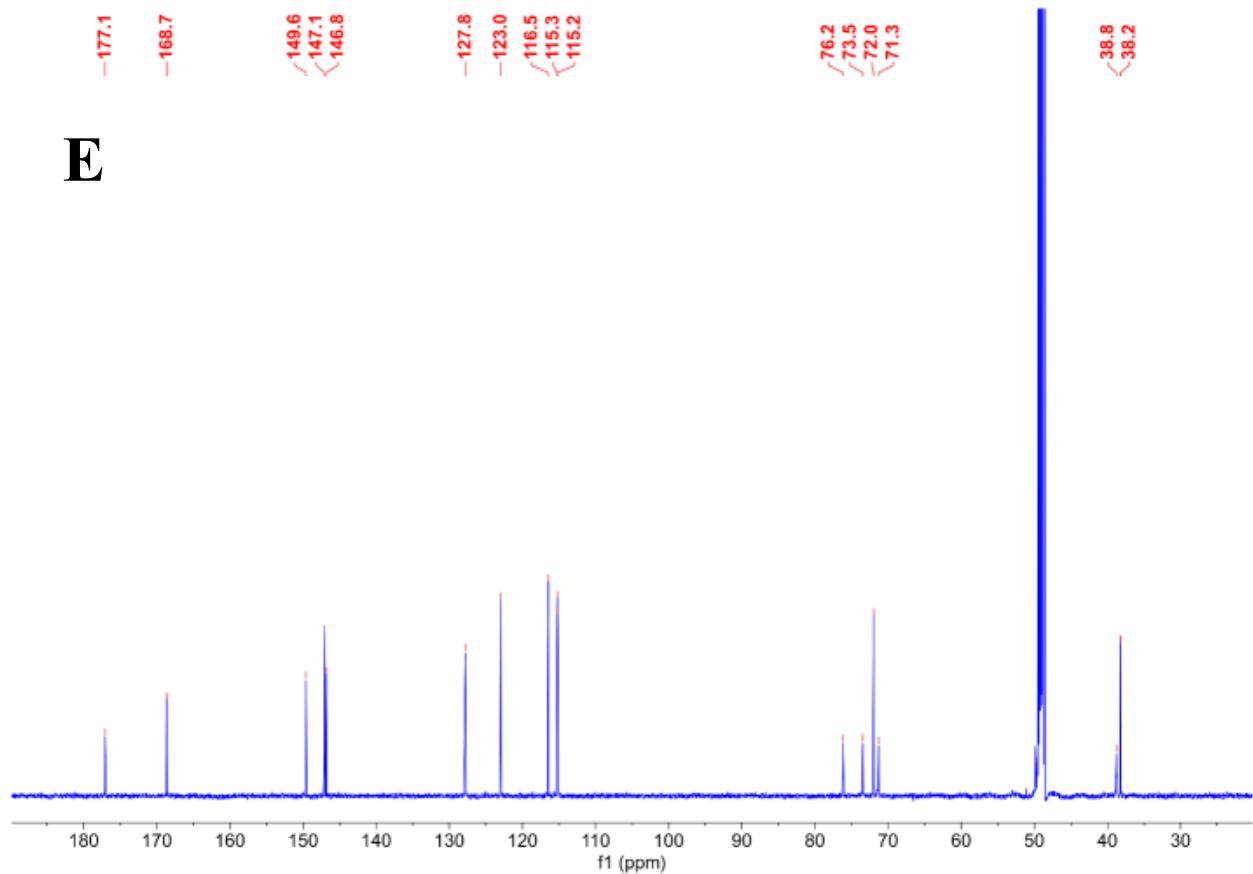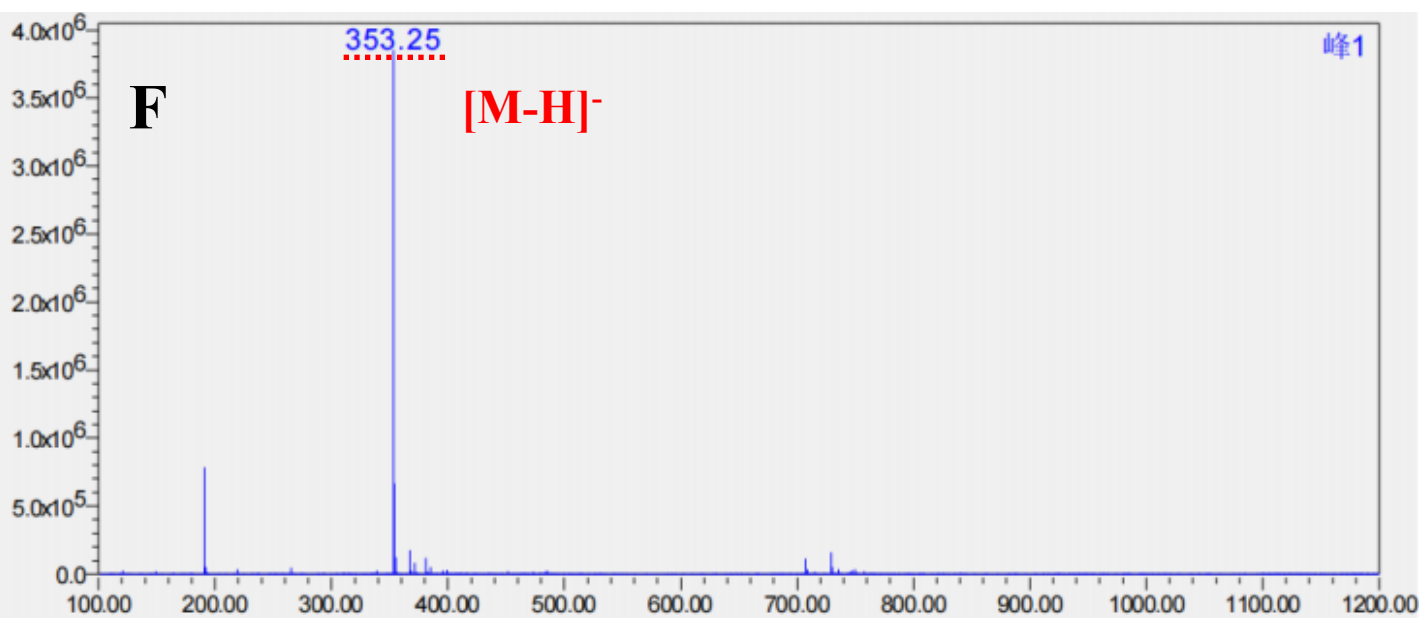

Supplementary Fig. S2. (continued)

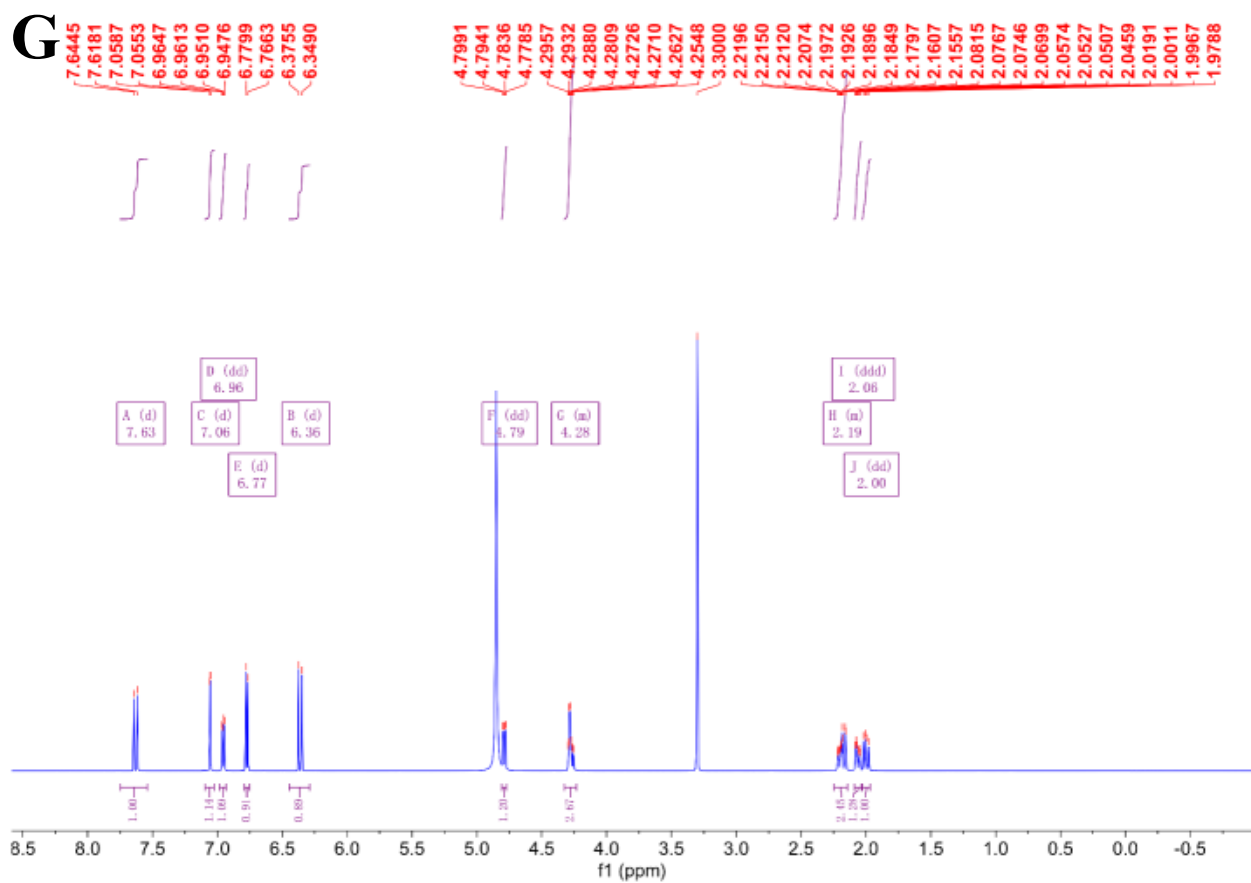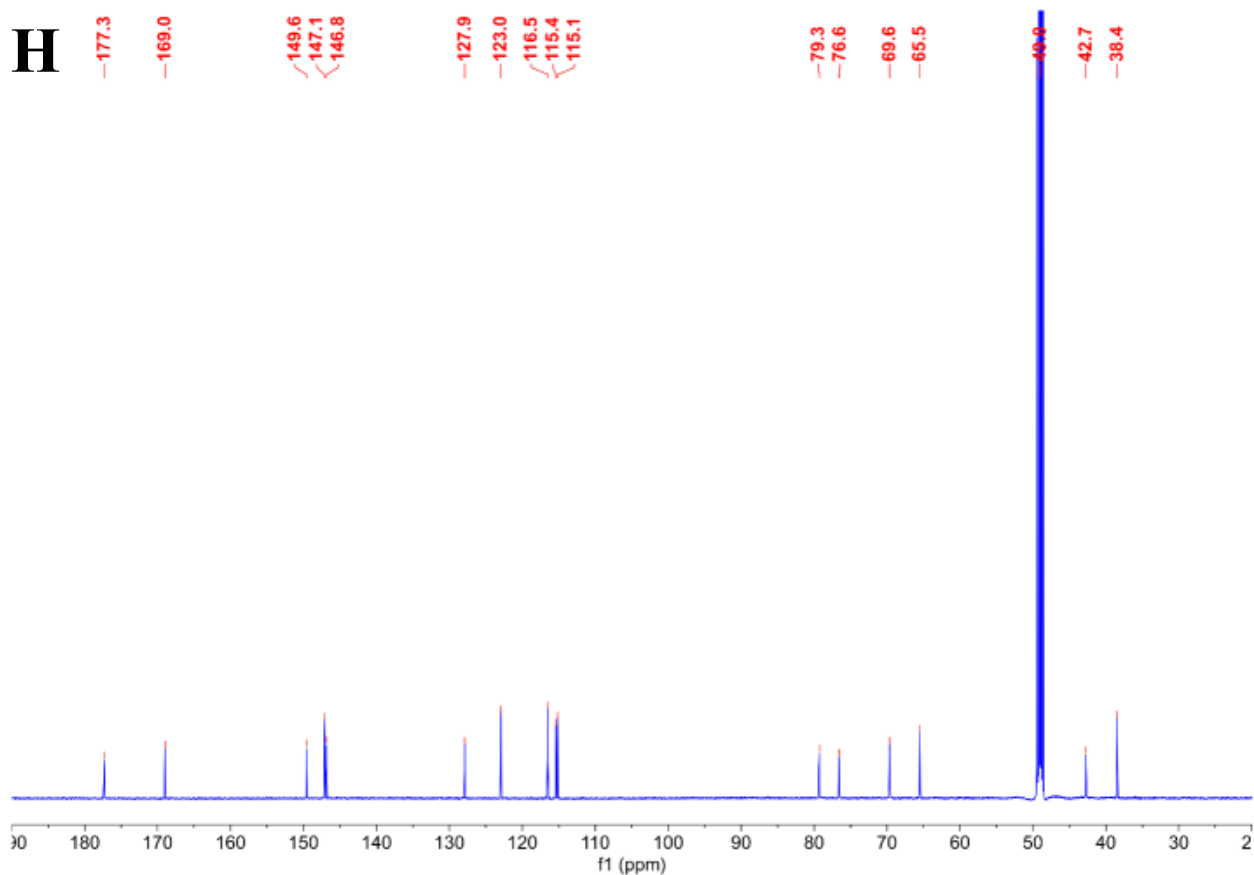

Supplementary Fig. S3.  $^1\text{H}$  NMR (600 MHz) (G),  $^{13}\text{C}$  NMR (151 MHz) (H), and HR-ESI-MS (I) spectra of compound Fr2-5-2-1 (cryptochlorogenic acid) in  $\text{MeOH-}d_4$ .

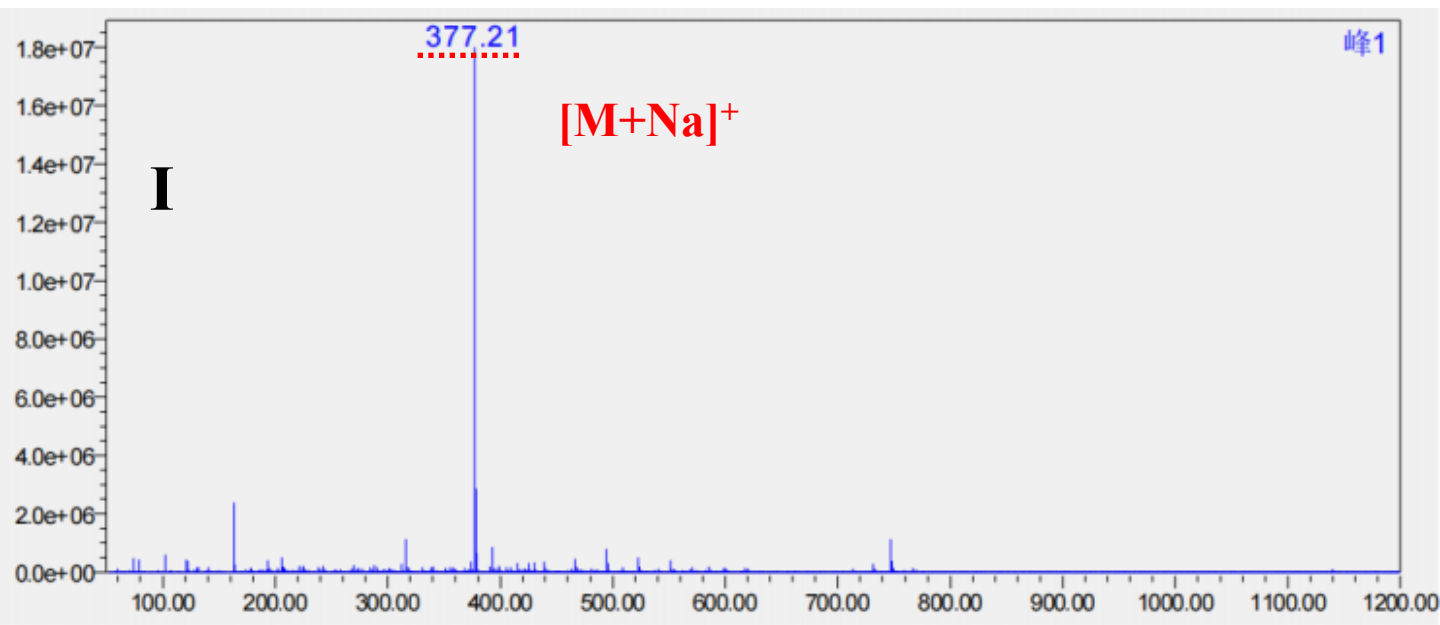

Supplementary Fig. S3. (continued)
